# Supplementary material for: Terpyridine derivatives as “turn-on” fluorescence chemosensors for the selective and sensitive detection of Zn2+ ions in solution and in live cells
Source: Royal Society of Chemistry journal article supplement (doi:10.1039/c8pp00186c), 2018-06-06
Supplement: c8pp00186c1.pdf [file c8pp00186c1.pdf]

## Supporting Informations

### **Terpyridine derivative as “turn-on” fluorescent chemosensor for the selective and sensitive detection of Zn<sup>2+</sup> ions in solution as well as in live cells**

Tripti Mandal,<sup>a</sup> Anowar Hossain,<sup>a</sup> Anamika Dhara,<sup>a</sup> Abdulla Al Masum,<sup>b</sup> Saugata Konar,<sup>c</sup> Saikat Kumar Manna,<sup>\*d</sup> Saikat Kumar Seth,<sup>e</sup> Sudipta Pathak<sup>\*d</sup> and Subrata Mukhopadhyay<sup>a</sup>

<sup>a</sup>Department of Chemistry, Jadavpur University, Jadavpur, Kolkata, West Bengal, India.

<sup>b</sup>Department of Life science & Bio-technology, Jadavpur University, Jadavpur, Kolkata, West Bengal, India.

<sup>c</sup>Department of Chemistry, Bhawanipur Education Society College, Bhowanipore, Kolkata, West Bengal, India.

<sup>d</sup>Department of Chemistry, Haldia Government College, Debhog, Purba Medinipur, West Bengal, India.

<sup>e</sup>Department of Physics, Jadavpur University, Jadavpur, Kolkata, West Bengal, India.

\*Corresponding Author, Tel: (03224) 252278; Fax: (03224)255873.

E-mail: sudiptachemster@gmail.com; saikat.manna.chem@gmail.com

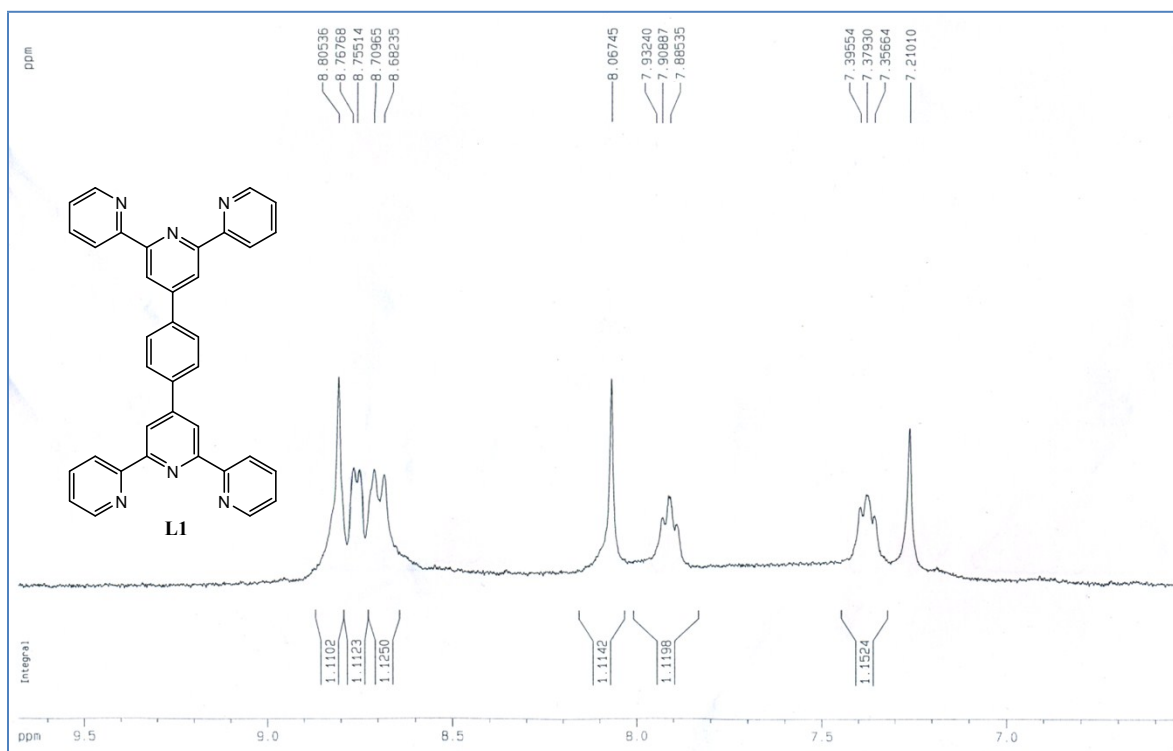

**Fig. S1** <sup>1</sup>H NMR spectrum of sensor **L1** in CDCl<sub>3</sub>.

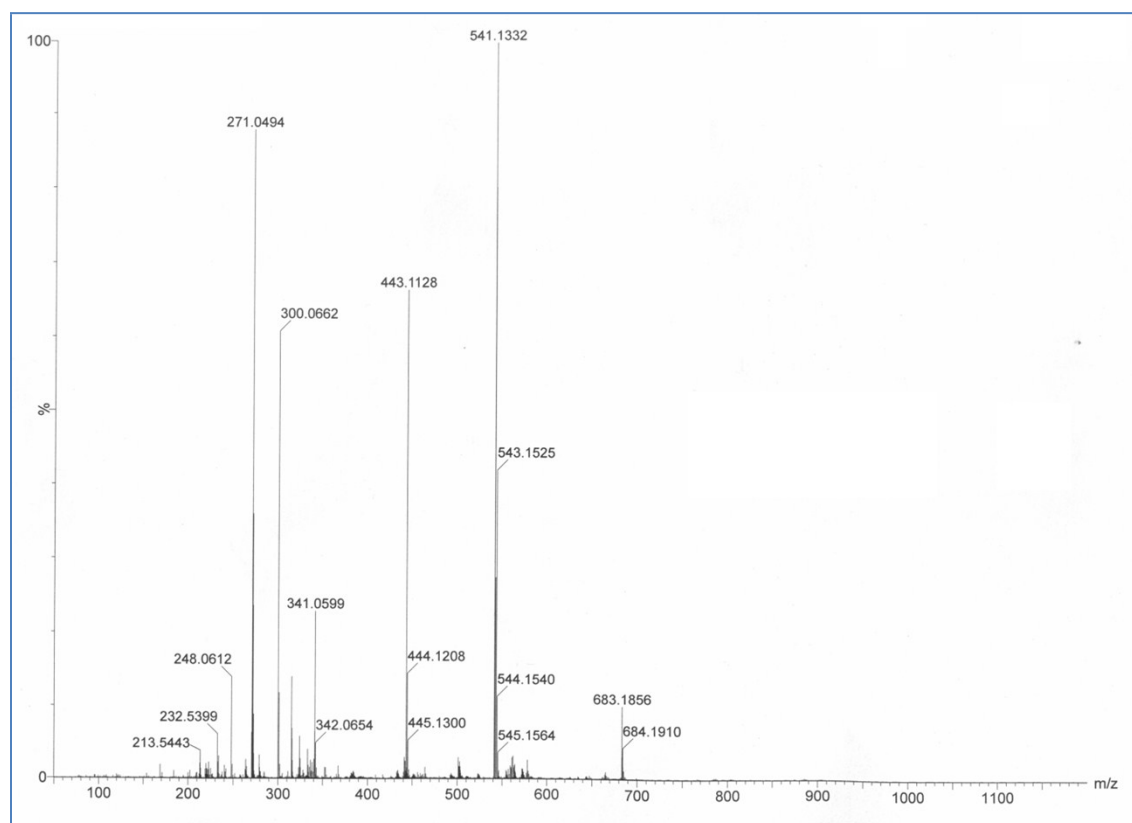

**Fig. S2** Mass spectrum of sensor **L1**.

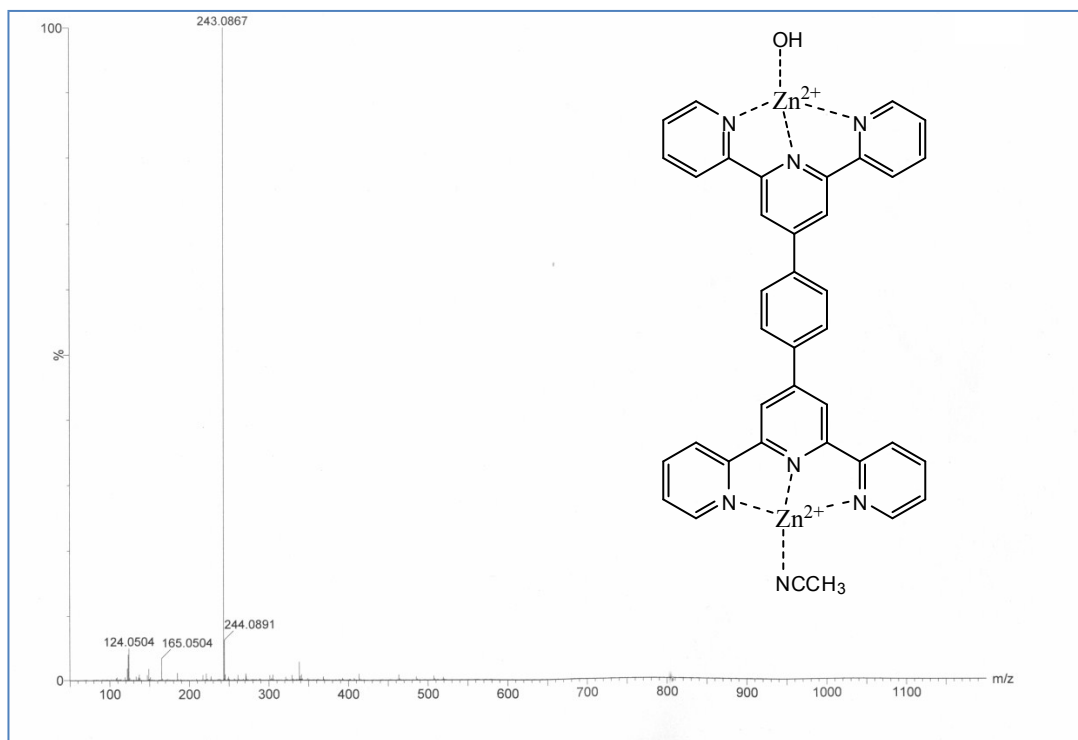

**Fig. S3** Mass spectrum of sensor **L1**-2Zn<sup>2+</sup> complex.

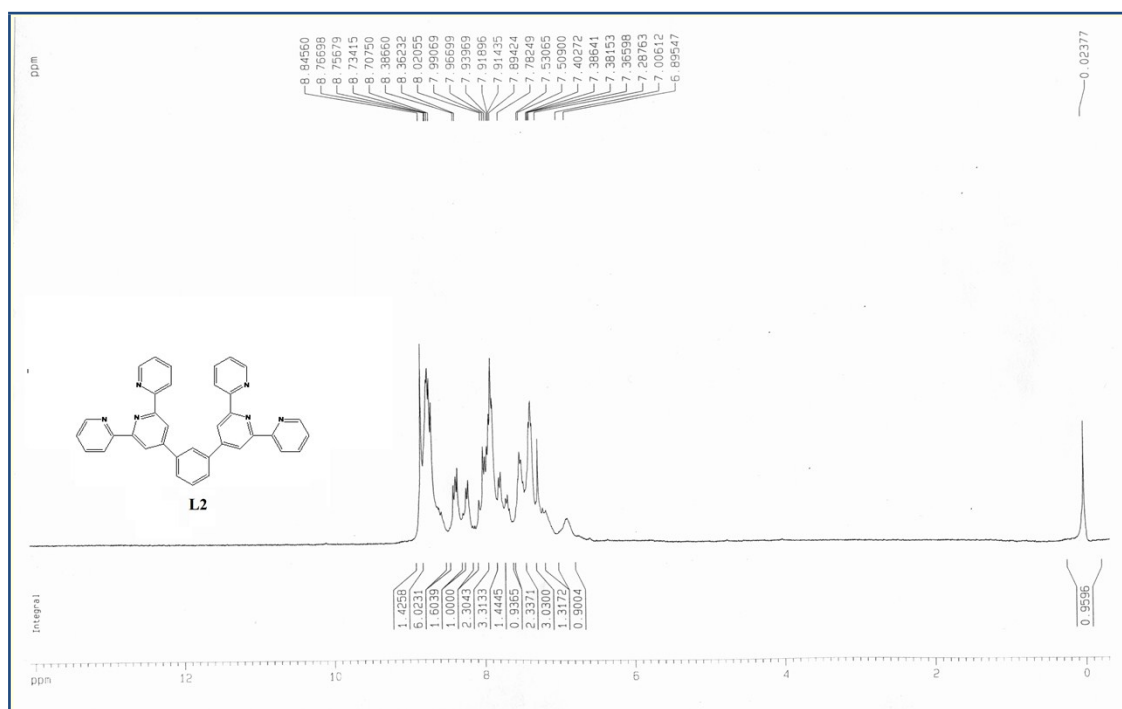

**Fig. S4** <sup>1</sup>H NMR spectrum of sensor **L2** in CDCl<sub>3</sub>.

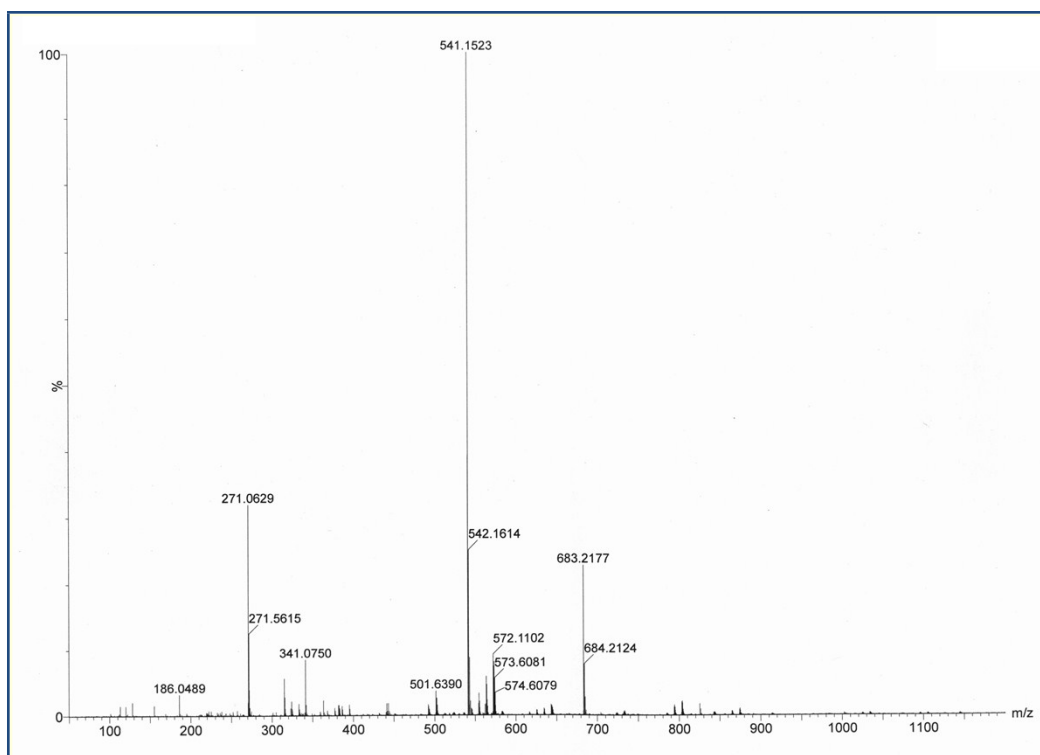

**Fig. S5** Mass spectrum of sensor **L2**.

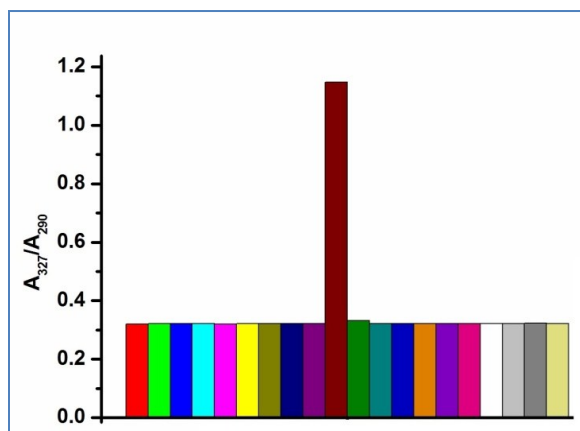

**Fig. S6** Change in the absorption spectrum of receptor **L1** [ $c = 4 \times 10^{-5}$  M,  $\text{CH}_3\text{CN}/\text{H}_2\text{O} = 1 : 1$ , v/v, 10 mM HEPES buffer, pH = 7.4) with respective metal cations ( $c = 4 \times 10^{-4}$  M, left to right- **L**,  $\text{Li}^+$ ,  $\text{Na}^+$ ,  $\text{K}^+$ ,  $\text{Ca}^{2+}$ ,  $\text{Mg}^{2+}$ ,  $\text{Sr}^{2+}$ ,  $\text{Ba}^{2+}$ ,  $\text{Mn}^{2+}$ ,  $\text{Zn}^{2+}$ ,  $\text{Al}^{3+}$ ,  $\text{Fe}^{2+}$ ,  $\text{Co}^{2+}$ ,  $\text{Ni}^{2+}$ ,  $\text{Cu}^{2+}$ ,  $\text{Cd}^{2+}$ ,  $\text{Pb}^{2+}$ ,  $\text{Hg}^{2+}$ ,  $\text{Pd}^{2+}$ , and  $\text{Ag}^+$ ).

### Binding constants calculation using fluorescence titration data:

The association constant and stoichiometry for the formation of the representative complexes were evaluated using the Benesi–Hildebrand (B–H) plot (eq 1).<sup>1</sup>

$$1/(I - I_0) = 1/K(I_{\max} - I_0)[M^{n+}] + 1/(I_{\max} - I_0) \quad (1)$$

where  $I_0$ ,  $I_{\max}$ , and  $I$  represent the emission intensity of free **L1**, the maximum emission intensity observed in the presence of added metal ion at 370 nm for  $Zn^{2+}$  ( $\lambda_{\text{ext}} = 312$  nm), and the emission intensity at a certain concentration of the metal ion added, respectively.

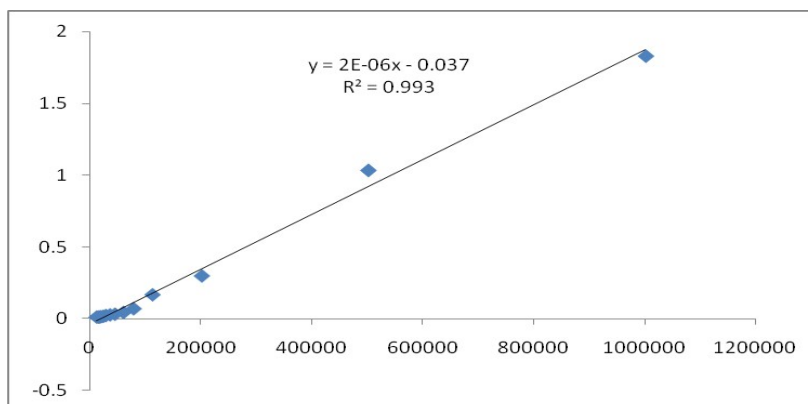

**Fig. S7** Benesi-Hildebrand plot obtained from the Fluorescence titration data of **L1** ( $4 \times 10^{-5}$  M) with  $Zn^{2+}$  ( $4 \times 10^{-4}$  M).

### Determination of Detection Limit:

The detection limit of **L1** for  $Zn^{2+}$  was determined from the following equation<sup>2</sup>:

$$\text{Detection limit} = K * Sb1/S \quad \text{Where } K = 2 \text{ or } 3 \text{ (we take 2 in this case);} \quad (2)$$

$Sb1$  is the standard deviation of the blank solution;  $S$  is the slope of the calibration curve

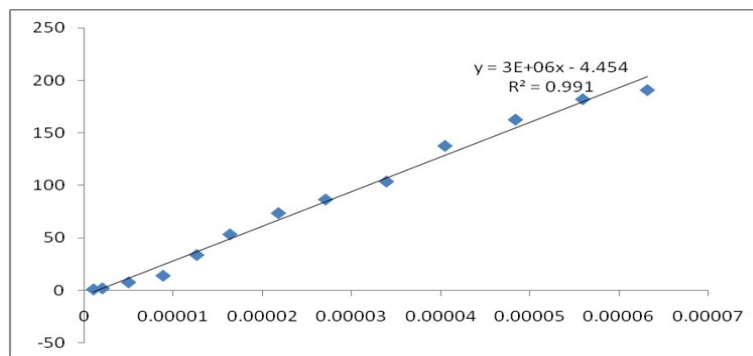

**Fig. S8** Calibration curve for fluorescence titration of **L1** with  $Zn^{2+}$ .

From the graph (Fig. S8) we get slope =  $3 \times 10^6$ , and Sb1 value is 14.64524

Thus using the formula we get the Detection Limit =  $9.76 \times 10^{-6} \text{ M} = 9.76 \mu\text{M}$

**Job's plot:**

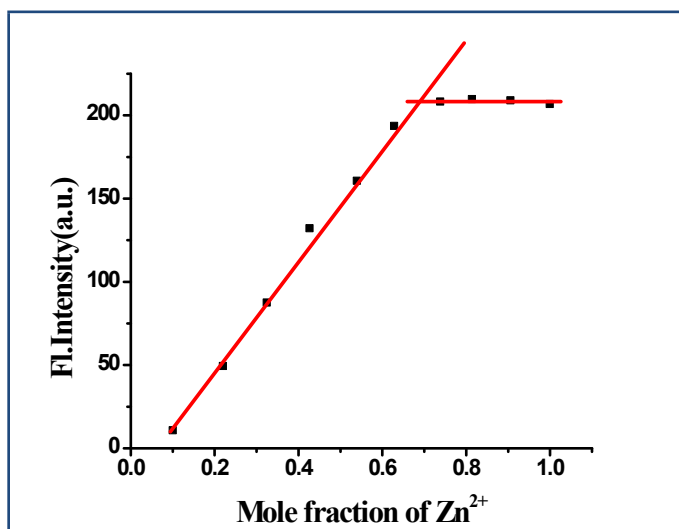

**Fig. S9** Fluorescence Job's plot for **L1** with  $\text{Zn}^{2+}$  in  $\text{CH}_3\text{CN}/\text{H}_2\text{O}$  solution (9:1, v/v, 10 mM HEPES buffer, pH 7.4). ( $[\text{H}] = [\text{G}] = 4 \times 10^{-5} \text{ M}$ ).

**Theoretical study:**

**Table S1.** HOMO-LUMO energy calculated for **L1** and **L1-2Zn<sup>2+</sup>** complex using [(B3LYP/6311G(d,p))] level of theory

| Species                   | E(HOMO)  | E(LUMO)  | $\Delta\text{E}(\text{Hartree})$ | $\Delta\text{E}(\text{eV})$ | $\Delta\text{E}(\text{kcal/mol})$ |
|---------------------------|----------|----------|----------------------------------|-----------------------------|-----------------------------------|
| <b>L1</b>                 | -0.24382 | -0.07043 | 0.17339                          | 4.718                       | 108.804                           |
| <b>L1-Zn<sup>2+</sup></b> | -0.58153 | -0.43667 | 0.14486                          | 3.942                       | 90.901                            |

1 Hartree = 27.2116 eV, 1 Hartree = 627.5095 kcal mol<sup>-1</sup>

|         |                                                                                     |                                                                                       |
|---------|-------------------------------------------------------------------------------------|---------------------------------------------------------------------------------------|
| LUMO+2  | 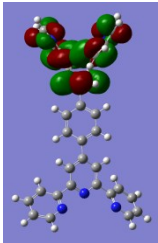   |    |
| LUMO+1  |    |    |
| LUMO    |    |    |
| HOMO    |  |   |
| HOM O-1 |  |  |
| HOMO-2  |  |  |

**Fig. S10** Molecular orbital plots of **L1** and **L1-2Zn<sup>2+</sup>**.

**Table S2.** Selected electronic excitation energies (eV) and oscillator strengths (f) of **L1** and **L1-2Zn<sup>2+</sup>**. The data were calculated by TDDFT//B3LYP/6-311+G(d,p) based on the optimized ground state geometries.

| Molecules                  | Excitation Energy <sup>a</sup> | f <sup>b</sup> | Composition <sup>c</sup> | (composition) % |
|----------------------------|--------------------------------|----------------|--------------------------|-----------------|
| <b>L1</b>                  | 4.1620 eV 297.89 nm            | 0.4316         | H → L                    | 63.6            |
|                            |                                |                | H-1 → L+3                | 3.49            |
|                            | 4.1908 eV 295.85 nm            | 0.1616         | H-2 → L                  | 80.97           |
|                            |                                |                | H-2 → L+3                | 6.69            |
|                            | 4.1991 eV 295.26 nm            | 1.0404         | H → L                    | 28              |
|                            |                                |                | H-1 → L                  | 62.89           |
|                            |                                |                | H-1 → L+1                | 2.92            |
| <b>L1-2Zn<sup>2+</sup></b> | 3.7806 eV 337.95 nm            | 0.9158         | H → L                    | 97.38           |
|                            | 3.7806 eV 327.95 nm            | 0.2146         | H -1 → L                 | 67.74           |
|                            |                                |                | H → L+3                  | 11.58           |
|                            | 4.0723 eV 309.46 nm            | 0.0840         | H → L+2                  | 86.22           |
|                            |                                |                | H-2 → L                  | 10.89           |

[a] Only selected excited states were considered. [b] Oscillator strength. [c] H stands for HOMO and L stands for LUMO.

### **Cell imaging experiments:**

**Minimum Inhibitory Concentration (MIC):** We have treated probe **L1** with both gram positive and gram negative bacteria. After 24 hrs of treatment probe **L1** shows no effect on gram negative bacteria but it showed some effect on gram positive bacteria. Probe **L1** showed



bacteriostatic activity on 150  $\mu\text{M}$ . The chances of survivability of bacteria decrease near about 80%.

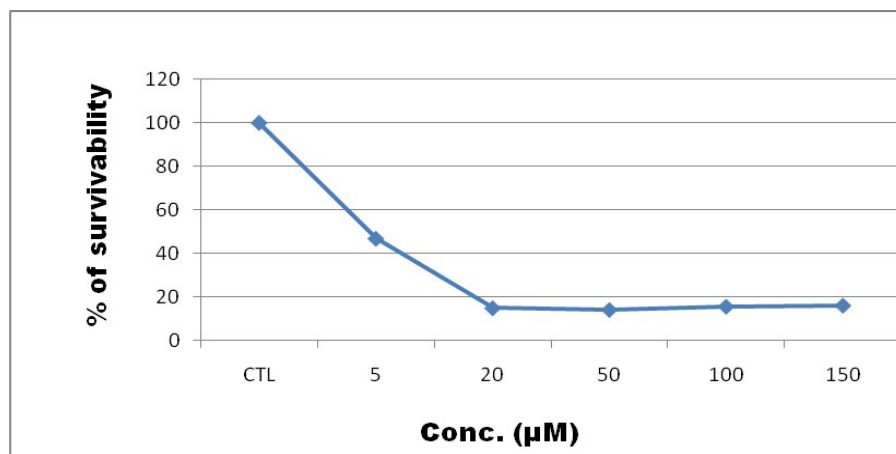

**Fig. S11** Activity of the probe **L1** on gram positive bacteria with increasing concentrations of compound.

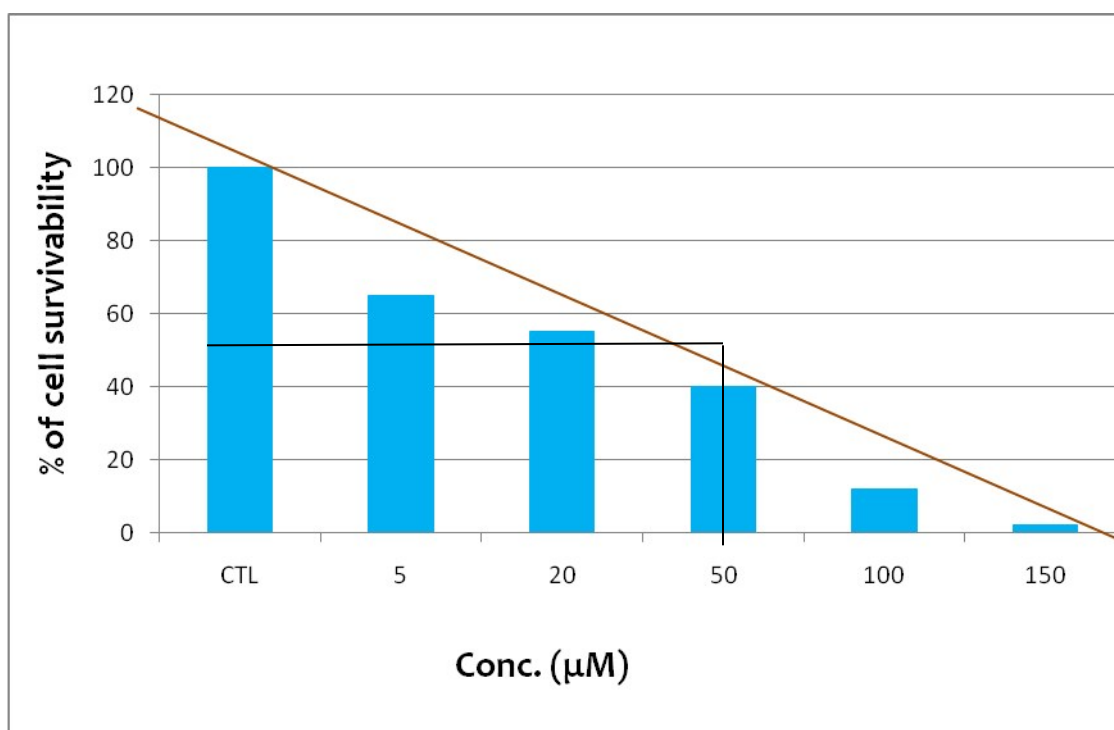

**Fig. S12** Cytotoxic effect of probe **L1** on MDA-MB-468 cells. Cells were incubated with increasing concentrations in compound and their survivability was assessed by MTT assay.

**Table S3.** Summary of representative fluorescent probes for Zn<sup>2+</sup>

| Paper                                                                                                                                                                     | Zn <sup>2+</sup> detection limit | Interferences (cation/anion) | Fluorescence probe structure                                                         | Any other remark                                                  | Our work                                                                                   |
|---------------------------------------------------------------------------------------------------------------------------------------------------------------------------|----------------------------------|------------------------------|--------------------------------------------------------------------------------------|-------------------------------------------------------------------|--------------------------------------------------------------------------------------------|
| 1. Selective zinc sensor based on pyrazoles and quinoline used to image cells.<br><br>(Dyes and Pigments, 113, 2015, 723–729)                                             | 30 nM                            | -                            | 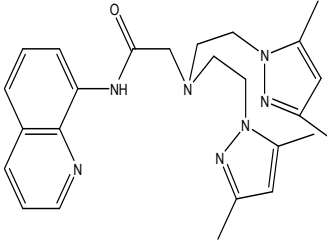   | Starting materials are not readily available.                     | Starting materials are commercially available.                                             |
| 2. Ratiometric and absolute water-soluble fluorescent tripodal zinc sensor and its application in killing human lung cancer cells.<br><br>(Analyst, 2013, 138, 4593–4598) | 3.2 μM                           | -                            |   | Starting materials are not readily available. Multistep reaction. | Starting materials are commercially available.<br><br>Comparable detection limit (9.76 μM) |
| 3. A highly sensitive and selective ratiometric fluorescent sensor for Zn <sup>2+</sup> ion based on ICT and FRET<br><br>(Dyes and Pigments, 102, 2014, 301–307)          | 33.6 nM                          | -                            |  | Starting materials are not readily available. Multistep reaction. | Starting materials are commercially available.<br><br>One pot synthesis.                   |
| 4. A small molecular fluorescent sensor for highly selectivity of zinc ion.<br><br>(Sensors and Actuators B, 176, 2013, 775– 781)                                         | 0.198 μM                         | -                            |  | Starting materials are not readily available. Multistep reaction. | Starting materials are commercially available.                                             |

|                                                                                                                                                                                                                           |              |                               |                                                                                      |                                                                                              |                                                                                    |
|---------------------------------------------------------------------------------------------------------------------------------------------------------------------------------------------------------------------------|--------------|-------------------------------|--------------------------------------------------------------------------------------|----------------------------------------------------------------------------------------------|------------------------------------------------------------------------------------|
| 5. A novel 3-Hydroxychromone fluorescence sensor for intracellular $Zn^{2+}$ and its application in the recognition of prostate cancer cells.<br><br>(Sensors and Actuators B, 245, 2017, 129–136)                        | -            | -                             | 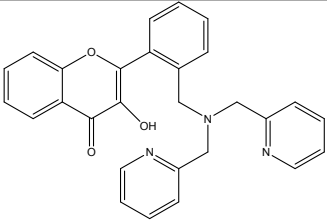   | Starting materials are not readily available. Multistep reaction.                            | Starting materials are commercially available.<br><br>Detection limit: $9.76\mu M$ |
| 6. Spectrofluorimetric determination of $Zn^{2+}$ ions in aqueous medium using 5-(4-fluorophenyl)-quinolin-8-ol.<br><br>(Journal of the Association of Arab Universities for Basic and Applied Sciences, 2017, 24, 66–73) | 3 ppb.       | $Fe^{3+}$ and $Cu^{2+}$       |     | Starting materials are not readily available. Multistep reaction. Interferences are present. | Starting materials are commercially available.<br><br>No interference.             |
| 7. Pyrimidine-based fluorescent zinc sensor: Photophysical characteristics, quantum chemical interpretation and application in real samples<br><br>(Sensors and Actuators B, 2014, 204–212)                               | $0.69\mu M$  |                               |  | Starting materials are not readily available.<br><br>23 fold fluorescence enhancement        | Starting materials are very common.<br><br>51 fold fluorescence enhancement.       |
| 8. An Easy and Accessible Water-soluble Sensor for the Distinctive Fluorescence Detection of $Zn^{2+}$ and $Al^{3+}$ ions<br><br>(RSC Adv., 2015, 5, 76939–76942)                                                         | $0.643\mu M$ | $Al^{3+}$<br>( $0.611\mu M$ ) |  | Interference present.                                                                        | No interference.                                                                   |
| 9. Selective fluorometric detection of F and $Zn(II)$ ions by a N, O coordinating sensor and naked eye detection of $Cu(II)$ ions in mixed-                                                                               | -            | $F^-$ & $Cu^{2+}$             |  | Interference present.                                                                        | No interference.                                                                   |

|                                                                                                                                                                                                                                                 |          |   |                                                                                     |                                                                                       |                                                                                      |
|-------------------------------------------------------------------------------------------------------------------------------------------------------------------------------------------------------------------------------------------------|----------|---|-------------------------------------------------------------------------------------|---------------------------------------------------------------------------------------|--------------------------------------------------------------------------------------|
| aqueous solution.<br><br>(RSC Adv., 2015, 5, 44764–44777)                                                                                                                                                                                       |          |   |                                                                                     |                                                                                       |                                                                                      |
| 10. An efficient, Schiff-base derivative for selective fluorescence sensing of Zn <sup>2+</sup> ions: quantum chemical calculation appended by real sample application and cell imaging study.<br><br>(Org. Biomol. Chem., 2014, 12, 6447–6456) | 0.141 μM | - | 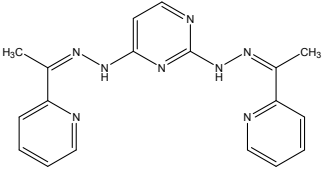  | Starting materials are not readily available.<br><br>45 fold fluorescence enhancement | Starting materials are very common.<br><br>51 fold fluorescence enhancement.         |
| 11. A Ratiometric Fluorescent Sensor for Zn <sup>2+</sup> Based on N,N'-Di(quinolin-8-yl)oxalamide.<br><br>(J Fluoresc, 2017, 27, 723–728)                                                                                                      | 2.4 μM   | - |  | Effective at pH 8.66. No biological application.                                      | pH 7.4.<br><br>Our sensor can detect intracellular Zn <sup>2+</sup> in living cells. |

### Quantum yield calculation:

Here, the quantum yield  $\phi$  was measured by using the following equation:

$$\phi_x = \phi_s (F_x / F_s) (A_s / A_x) (n_x^2 / n_s^2)$$

Where, X & S indicate the unknown and standard solution respectively,  $\phi$  = quantum yield, F = area under the emission curve, A = absorbance at the excitation wave length, n = index of refraction of the solvent. Here  $\phi$  measurements were performed using anthracene in ethanol as standard [ $\phi = 0.28$ ] for standard (s) anthracene in ethanol the following values were determined:  $n_s = 1.36$  (for ethanol);  $n_x = 1.34$  (for acetonitrile);  $\phi_s = 0.28$ .

Using the above equation, we calculated quantum yield of **L1** and **L1-2Zn<sup>2+</sup>**. Quantum yield data are given in table S4.

**Table S4.** Quantum yield data

| Molecules                  | Quantum Yield ( $\phi$ ) |
|----------------------------|--------------------------|
| <b>L1</b>                  | 0.0005                   |
| <b>L1-2Zn<sup>2+</sup></b> | 0.0254                   |

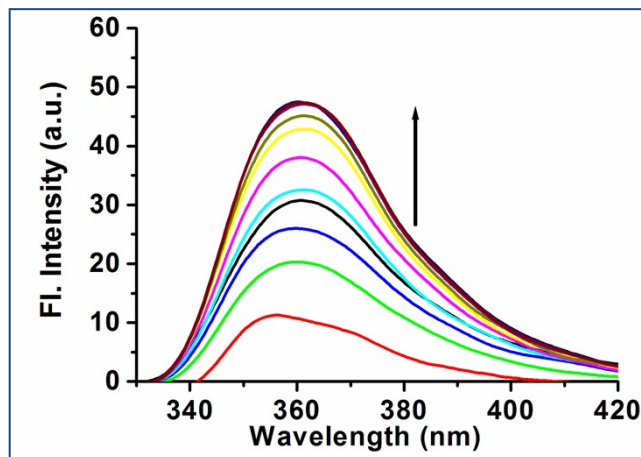

**Fig. S13** Fluorescence emission changes of **L2** ( $4 \times 10^{-5}$  M) with the continuous addition of  $\text{Zn}^{2+}$  ( $c = 4 \times 10^{-4}$  M) in  $\text{CH}_3\text{CN}/\text{H}_2\text{O}$  solution (9:1, v/v, 10 mM HEPES buffer, pH 7.4).  $\lambda_{\text{ex}} = 300$  nm.

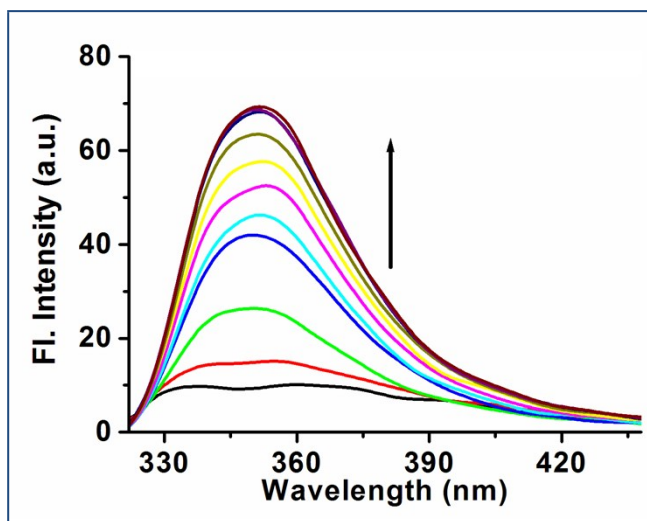

**Fig. S14** Fluorescence emission changes of **L3** ( $4 \times 10^{-5}$  M) with the continuous addition of  $\text{Zn}^{2+}$  ( $c = 4 \times 10^{-4}$  M) in  $\text{CH}_3\text{CN}/\text{H}_2\text{O}$  solution (9:1, v/v, 10 mM HEPES buffer, pH 7.4).  $\lambda_{\text{ex}} = 290$  nm.
